# Supplementary material for: Relationship between Acropora millepora juvenile fluorescence and composition of newly established Symbiodinium assemblage
Source: PeerJ journal article supplement (doi:10.7717/peerj.5022), 2018-06-15

A

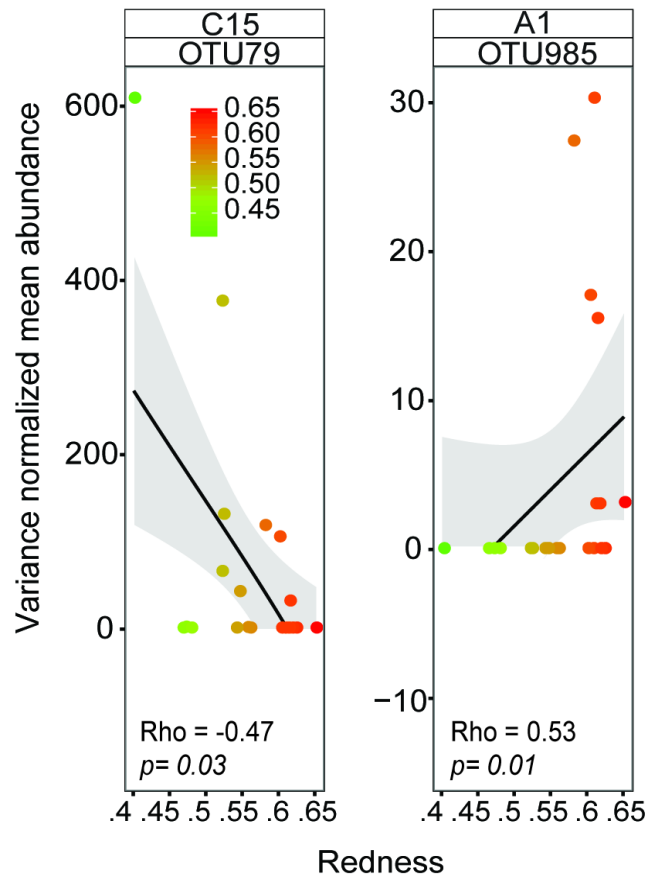

B

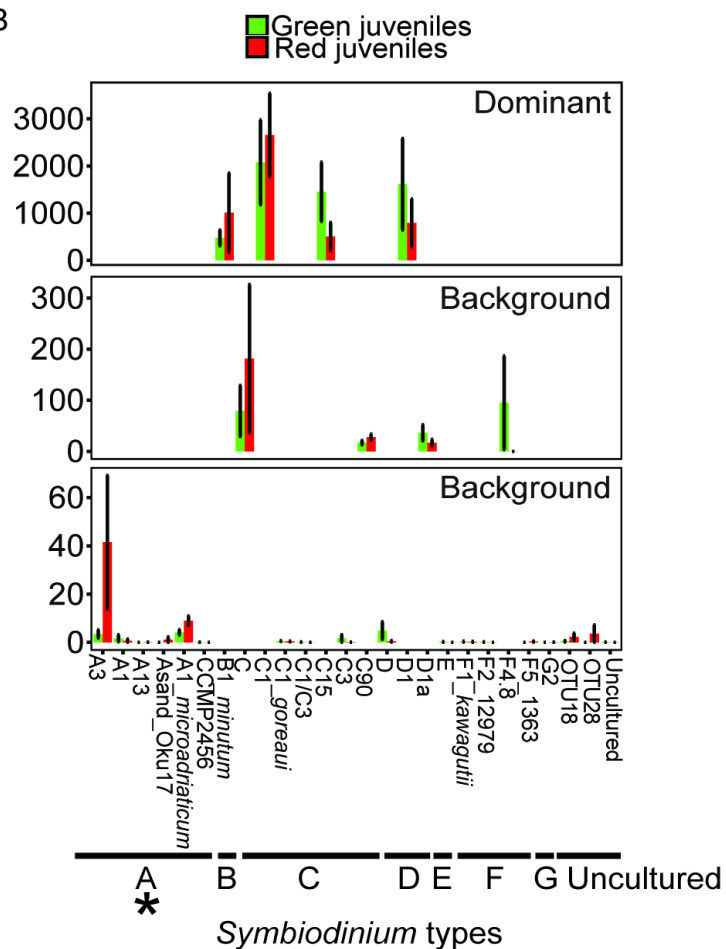

Supplement: FigS1_pr_01.pdf [file FigS1_pr_01.pdf]
